# Supplementary material
Source: publisher figshare collection journal article supplement (https://gsapubs.figshare.com/articles/dataset/_/23631840)
Supplement: Supplementary file 1 [file 2]

## Sheet: Table S5
TABLE S5. STEP HEATING ANALYSES FOR K-FELDSPAR SAMPLE GR-19
Sample: GR-19	J = 0.00256880	± J = 0.00001284
Exp #	Temperature (°C)	Dwell time (min)	Radiogenic 40Ar [fA]	39K [fA]	% Radiogenic	K/Ca	Age (Ma)	±Age (Ma)	40/39	37/39	36/39	36/40	Step included in measured goal spectrum for MDD modeling (N=0; Y=1)?
LU1559-001	470	15	29469	9.41544	99.1057	0.542331	3981.28	6.60465	3156.4	0.792446	0.0957356	3.02632e-05	0
LU1559-002	500	15	7687.8	7.60156	99.0733	0.23251	2315.3	4.20602	1019.52	1.84706	0.0324571	3.13573e-05	0
LU1559-003	520	15	4624.02	9.98282	99.0208	0.231636	1417.43	2.90443	467.188	1.85402	0.0159667	3.31305e-05	0
LU1559-004	520	15	342.262	6.71338	95.848	-0.896792	222.548	4.72119	54.6721	-0.479644	0.00755298	0.000140464	0
LU1559-005	540	15	4519.83	12.2995	98.8876	1.86839	1202.06	2.28663	371.556	0.230108	0.0140458	3.76394e-05	0
LU1559-006	540	15	510.735	8.39895	94.6439	0.511804	262.468	3.85535	64.214	0.839686	0.011858	0.00018122	0
LU1559-007	560	15	5585.23	15.4989	99.0225	1.0267	1184.97	1.75326	363.816	0.4187	0.0121432	3.30728e-05	0
LU1559-008	560	15	521.936	9.8691	96.6434	-0.341117	230.351	3.08839	54.7696	-1.26165	0.00588635	0.000113546	0
LU1559-009	580	15	3983.17	16.3949	99.208	0.983373	876.943	1.57985	244.818	0.437141	0.0066744	2.67922e-05	0
LU1559-010	580	15	466.227	11.1555	97.7717	1.60318	184.409	2.88606	42.7383	0.268167	0.00329194	7.53495e-05	0
LU1559-011	610	15	12977	31.5069	99.1252	27.6567	1305.15	0.907662	415.508	0.0155476	0.0123026	2.95988e-05	0
LU1559-012	610	15	494.272	17.3126	95.0899	-0.424628	127.982	1.70509	30.0447	-1.01335	0.00472274	0.000166082	0
LU1559-013	630	15	2404.12	26.8826	98.1507	1.08187	373.948	1.03808	91.0907	0.397351	0.00580293	6.25561e-05	0
LU1559-014	630	15	453.576	19.1979	95.2419	-1.9783	106.547	1.66112	24.8103	-0.217391	0.00393548	0.000160922	1
LU1559-015	660	15	4684.57	41.6895	98.7032	14.6302	458.583	0.726482	113.842	0.0293906	0.00500122	4.38634e-05	0
LU1559-016	660	15	631.149	26.7423	97.1981	-1.06598	106.437	1.28647	24.2882	-0.403494	0.00219427	9.47185e-05	1
LU1559-017	690	15	3108.62	50.6753	98.3091	12.1025	264.614	0.575782	62.3975	0.0355289	0.00357735	5.71822e-05	0
LU1559-018	690	15	757.879	32.987	96.1882	-1.89407	103.693	0.977344	23.8892	-0.22706	0.00301918	0.000128891	1
LU1559-019	720	15	2577.38	54.483	98.06	-3.27673	207.387	0.542065	48.2463	-0.13124	0.00313037	6.56009e-05	0
LU1559-020	720	15	825.563	33.6026	96.2668	-5.21124	110.669	0.930863	25.5226	-0.0825186	0.00320012	0.000126239	1
LU1559-021	750	15	2031.4	50.5121	97.9672	3.85581	177.78	0.575447	41.0475	0.111511	0.00285054	6.87303e-05	1
LU1559-022	780	15	2437.52	60.7712	97.9833	7.84153	177.332	0.467737	40.9338	0.0548342	0.00280548	6.81852e-05	1
LU1559-023	810	15	2469.93	63.8107	98.0828	76.9803	171.415	0.481418	39.4635	0.00558582	0.00255934	6.48172e-05	1
LU1559-024	840	15	2669.37	65.4419	98.3783	-18.9661	180.194	0.472705	41.4629	-0.0226724	0.00226691	5.48183e-05	0
LU1559-025	870	15	2700.58	68.5651	98.7435	-2.91371	174.286	0.437867	39.8922	-0.147593	0.00165481	4.24575e-05	1
LU1559-026	900	15	3246.06	74.9939	98.5273	3.25442	190.652	0.433907	43.9274	0.132116	0.00222149	4.97802e-05	1
LU1559-027	930	15	4219.24	86.3562	98.5345	11.127	213.805	0.369246	49.5839	0.0386437	0.0024667	4.95433e-05	1
LU1559-028	960	15	5075.01	90.6752	98.7267	-757.4	242.917	0.348854	56.691	-0.000567732	0.00244002	4.30439e-05	1
LU1559-029	990	15	5992.21	87.6979	98.8225	104.183	292.425	0.376946	69.1418	0.00412736	0.00275363	3.98105e-05	1
LU1559-030	1010	15	6004.07	73.1156	98.6944	-16.1171	346.112	0.453034	83.2054	-0.0266802	0.00366678	4.41539e-05	1
LU1559-031	1030	15	6761.85	68.8156	98.5126	-41.1392	406.999	0.47715	99.7446	-0.0104524	0.00501533	5.03097e-05	1
LU1559-032	1050	15	8207.22	69.7619	91.1591	86.6424	477.508	0.503285	129.055	0.00496291	0.0386103	0.000299168	1
LU1559-033	1050	30	13913.4	104.782	97.9913	-1.76139	530.721	5.26219	139.259	-0.244166	0.00939982	6.79597e-05	1
LU1559-034	1050	60	23461.2	146.239	98.6443	-14.4285	624.027	0.482652	162.638	-0.0298026	0.00745127	4.58623e-05	1
LU1559-035	1050	60	17855.5	100.762	98.9758	1.07006	678.381	0.687612	178.989	0.401735	0.0063075	3.46442e-05	1
LU1559-036	1050	60	13593.9	73.9795	99.0495	0.793494	699.163	0.92698	185.447	0.541708	0.00610601	3.21509e-05	1
LU1559-037	1050	60	11586.2	60.9652	99.3634	0.594553	718.915	1.11702	191.169	0.722877	0.00430714	2.15285e-05	1
LU1559-038	1050	60	9674.34	49.5383	99.3838	0.432983	735.211	1.35913	196.368	0.992441	0.00435528	2.08402e-05	1
LU1559-039	1050	60	9426.74	47.1213	99.3265	0.506073	749.883	1.41262	201.293	0.849189	0.0048104	2.27796e-05	1
LU1559-040	1070	15	4189.59	19.0664	98.5967	-0.414555	809.296	2.09539	223.022	-1.03799	0.010315	4.74776e-05	1
LU1559-041	1090	15	5989.79	26.9256	98.9115	-1.35229	817.353	1.72404	224.954	-0.318048	0.00820025	3.68245e-05	1
LU1559-042	1110	15	10821.6	46.3039	98.8917	-1.76239	850.308	1.18979	236.366	-0.244027	0.00879797	3.7494e-05	0
LU1559-043	1140	15	16583.6	66.242	99.0081	1.8486	897.975	1.05646	252.816	0.232572	0.00854558	3.35585e-05	0
LU1559-044	1170	15	52544.2	193.733	98.9689	-212.037	956.041	0.502115	274.047	-0.00202795	0.00955978	3.48858e-05	0
LU1559-045	1200	15	145350	573.61	99.2455	0.814765	906.567	0.50196	255.229	0.52757	0.00665334	2.55233e-05	0
LU1559-046	1230	15	212789	928.48	99.2647	1.50558	837.119	0.318174	230.833	0.285549	0.00581689	2.48728e-05	0
LU1559-047	1270	15	55698.2	256.479	99.3075	-2.25776	801.643	0.772225	218.708	-0.190479	0.00507277	2.34239e-05	0
LU1559-048	1300	15	4187.35	17.7293	99.7357	2.24694	857.477	8.9999	236.777	0.191347	0.00216798	8.93364e-06	0
LU1559-049	1340	15	645.532	0.557941	105.159	0.00366423	2494.19	635.304	1018.92	108.678	-0.149151	-0.000174582	0
LU1559-050	1400	15	367.138	-1.028	94.9742	0.112515	-4509.88	6555.44	-375.061	3.8118	-0.0628346	0.000170084	0
Ratios are corrected for blanks, decay, and interference
